# Supplementary material for: Aromaticity reversals and their effect on bonding in the low-lying electronic states of cyclooctatetraene
Source: Royal Society of Chemistry journal article supplement (doi:10.1039/d1cp04394c), 2021-01-01
Supplement: d1cp04394c2.pdf [file d1cp04394c2.pdf]

## Electronic Supplementary Information

### **Aromaticity reversals and their effect on bonding in the low-lying electronic states of cyclooctatetraene**

Peter B. Karadakov\* and Nicholas Preston

Department of Chemistry, University of York, Heslington, York YO10 5DD, UK

E-mail: peter.karadakov@york.ac.uk

#### **Table of Contents**

|                                                                                                                                                                               |           |
|-------------------------------------------------------------------------------------------------------------------------------------------------------------------------------|-----------|
| <b>1. Additional Figures .....</b>                                                                                                                                            | <b>S2</b> |
| <b>2. Gaussian Cube Files with Isotropic Shielding Values .....</b>                                                                                                           | <b>S3</b> |
| <b>3. Additional Computational Details.....</b>                                                                                                                               | <b>S3</b> |
| <b>4. Optimised Geometries and Other Computational Data.....</b>                                                                                                              | <b>S4</b> |
| <b>5. Additional Information about the CASSCF(8,8) Wavefunctions for the S<sub>0</sub>, S<sub>1</sub>, S<sub>2</sub> and T<sub>1</sub> States of D<sub>8h</sub> COT .....</b> | <b>S5</b> |

## 1. Additional Figures

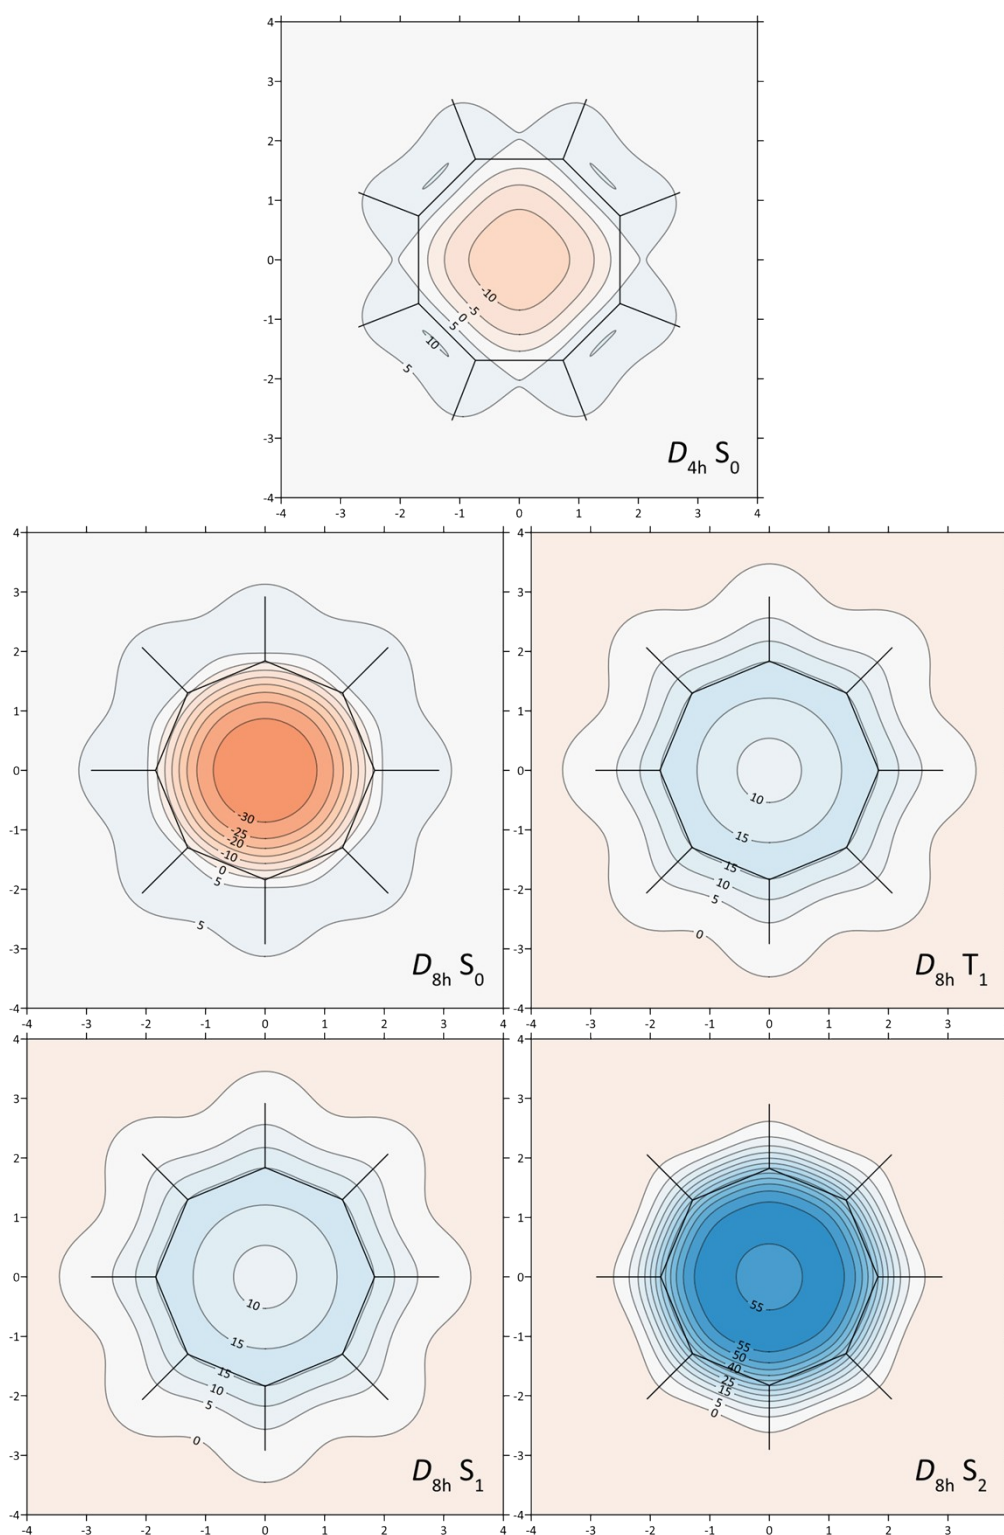

**Fig. S1.** Isotropic shielding contour plots for the  $S_0$  (at  $D_{4h}$  and  $D_{8h}$  geometries),  $T_1$ ,  $S_1$  and  $S_2$  (at  $D_{8h}$  geometries) electronic states of COT in planes 1 Å above the respective molecular planes. CASSCF(8,8)-GIAO/6-311+G\*//CASSCF(8,8)/6-31G\*\* level of theory,  $\sigma_{\text{iso}}(\mathbf{r})$  in ppm, distances in Å.

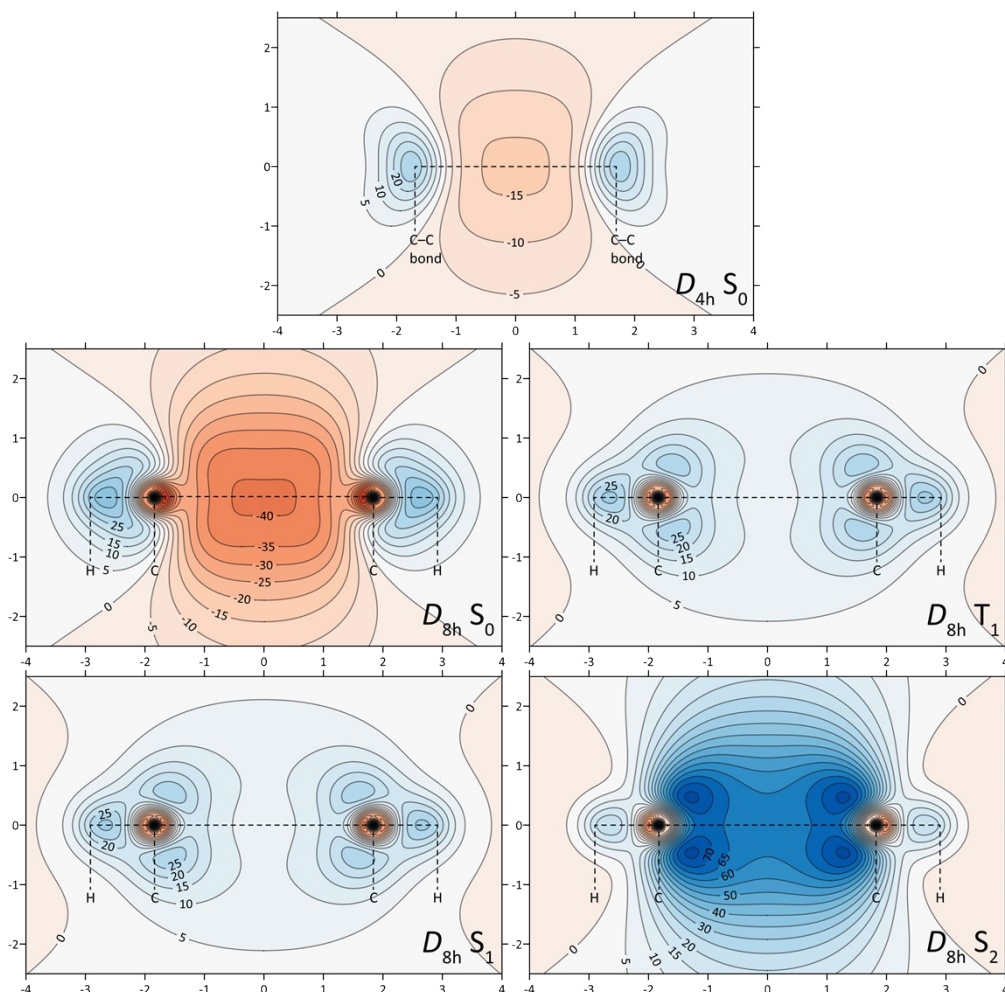

**Fig. S2.** Isotropic shielding contour plots for the  $S_0$  (at  $D_{4h}$  and  $D_{8h}$  geometries),  $T_1$ ,  $S_1$  and  $S_2$  (at  $D_{8h}$  geometries) electronic states of COT in vertical planes perpendicular to the respective molecular planes. The vertical plane for the  $S_0$  state at the  $D_{4h}$  geometry is passing through the midpoints of two opposite C–C bonds; for all other states the vertical planes are passing through two opposite C–H units. Other details as for Figure S1.

## 2. Gaussian Cube Files with Isotropic Shielding Values

A zip archive of Gaussian cube files with isotropic shielding values for the  $S_0$  (at  $D_{2d}$ ,  $D_{4h}$  and  $D_{8h}$  geometries),  $T_1$ ,  $S_1$  and  $S_2$  (at  $D_{8h}$  geometries) electronic states of COT is available as a separate download. These files can be examined with several programs, including GaussView (see <https://gaussian.com/gaussview6/>) and Visual Molecular Dynamics (VMD, see <https://www.ks.uiuc.edu/Research/vmd/>). Both URLs were checked on 24 September 2021.

## 3. Additional Computational Details

All GAUSSIAN CASSCF(8,8)/6-31G\*\* and CASSCF(8,8)/cc-pVTZ geometry optimizations reported in this paper were carried out using the option “Opt(VeryTight)”.

All DALTON CASSCF(8,8)-GIAO/6-311+G\* NMR shielding tensor calculations were run without changes to the default program options.

#### 4. Optimised Geometries

The geometries of all states of COT of  $D_{8h}$  symmetry are defined completely by the data included in Table 1.

For the geometries below, all coordinates are in Å.

CASSCF(8,8)/6-31G\*\* optimised geometry of  $D_{2d}$   $S_0$  COT.

|   |           |           |           |
|---|-----------|-----------|-----------|
| C | -0.671777 | 1.562419  | 0.387958  |
| C | -1.562419 | 0.671777  | -0.387958 |
| C | -1.562419 | -0.671777 | -0.387958 |
| C | -0.671777 | -1.562419 | 0.387958  |
| C | 0.671777  | -1.562419 | 0.387958  |
| C | 1.562419  | -0.671777 | -0.387958 |
| C | 1.562419  | 0.671777  | -0.387958 |
| C | 0.671777  | 1.562419  | 0.387958  |
| H | -1.172715 | 2.323498  | 0.966126  |
| H | -2.323498 | 1.172715  | -0.966126 |
| H | -2.323498 | -1.172715 | -0.966126 |
| H | -1.172715 | -2.323498 | 0.966126  |
| H | 1.172715  | -2.323498 | 0.966126  |
| H | 2.323498  | -1.172715 | -0.966126 |
| H | 2.323498  | 1.172715  | -0.966126 |
| H | 1.172715  | 2.323498  | 0.966126  |

CASSCF(8,8)/cc-pVTZ optimised geometry of  $D_{2d}$   $S_0$  COT.

|   |           |           |           |
|---|-----------|-----------|-----------|
| C | -0.669177 | 1.560748  | 0.384289  |
| C | -1.560748 | 0.669177  | -0.384289 |
| C | -1.560748 | -0.669177 | -0.384289 |
| C | -0.669177 | -1.560748 | 0.384289  |
| C | 0.669177  | -1.560748 | 0.384289  |
| C | 1.560748  | -0.669177 | -0.384289 |
| C | 1.560748  | 0.669177  | -0.384289 |
| C | 0.669177  | 1.560748  | 0.384289  |
| H | -1.168154 | 2.323977  | 0.956803  |
| H | -2.323977 | 1.168154  | -0.956803 |
| H | -2.323977 | -1.168154 | -0.956803 |
| H | -1.168154 | -2.323977 | 0.956803  |
| H | 1.168154  | -2.323977 | 0.956803  |
| H | 2.323977  | -1.168154 | -0.956803 |
| H | 2.323977  | 1.168154  | -0.956803 |
| H | 1.168154  | 2.323977  | 0.956803  |

CASSCF(8,8)/6-31G\*\* optimised geometry of  $D_{4h}$   $S_0$  COT.

|   |           |           |          |
|---|-----------|-----------|----------|
| C | 0.675524  | 1.716236  | 0.000000 |
| C | 1.716236  | 0.675524  | 0.000000 |
| C | 1.716236  | -0.675524 | 0.000000 |
| C | 0.675524  | -1.716236 | 0.000000 |
| C | -0.675524 | -1.716236 | 0.000000 |
| C | -1.716236 | -0.675524 | 0.000000 |
| C | -1.716236 | 0.675524  | 0.000000 |
| C | -0.675524 | 1.716236  | 0.000000 |
| H | 1.107408  | 2.703584  | 0.000000 |

|   |           |           |          |
|---|-----------|-----------|----------|
| H | 2.703584  | 1.107408  | 0.000000 |
| H | 2.703584  | -1.107408 | 0.000000 |
| H | 1.107408  | -2.703584 | 0.000000 |
| H | -1.107408 | -2.703584 | 0.000000 |
| H | -2.703584 | -1.107408 | 0.000000 |
| H | -2.703584 | 1.107408  | 0.000000 |
| H | -1.107408 | 2.703584  | 0.000000 |

CASSCF(8,8)/cc-pVTZ optimised geometry of  $D_{4h}$   $S_0$  COT.

|   |           |           |           |
|---|-----------|-----------|-----------|
| C | 0.672701  | 1.712477  | 0.000000  |
| C | 1.712477  | 0.672701  | -0.000000 |
| C | 1.712477  | -0.672701 | 0.000000  |
| C | 0.672701  | -1.712477 | -0.000000 |
| C | -0.672701 | -1.712477 | 0.000000  |
| C | -1.712477 | -0.672701 | -0.000000 |
| C | -1.712477 | 0.672701  | 0.000000  |
| C | -0.672701 | 1.712477  | -0.000000 |
| H | 1.103917  | 2.697556  | 0.000000  |
| H | 2.697556  | 1.103917  | -0.000000 |
| H | 2.697556  | -1.103917 | 0.000000  |
| H | 1.103917  | -2.697556 | -0.000000 |
| H | -1.103917 | -2.697556 | 0.000000  |
| H | -2.697556 | -1.103917 | -0.000000 |
| H | -2.697556 | 1.103917  | 0.000000  |
| H | -1.103917 | 2.697556  | -0.000000 |

## 5. Additional Information about the CASSCF(8,8) Wavefunctions for the $S_0$ , $S_1$ , $S_2$ and $T_1$ States of $D_{8h}$ COT

As explained in the section Computational procedure, the largest subgroup of the  $D_{8h}$  point group supported by the Dalton program package is  $D_{2h}$ , therefore the  $S_0$ ,  $S_1$ ,  $S_2$  and  $T_1$  states of  $D_{8h}$  COT were treated as the  $1^1B_{1g}$ ,  $1^1A_g$ ,  $2^1A_g$  and  $1^3B_{1g}$  states, respectively. The data included below provides details of the compositions of the respective CASSCF(8,8)/6-311+G\*\*/CASSCF(8,8)/6-31G\*\* wavefunctions taken from the Dalton output files. Note that due to the use of state-optimized CASSCF wavefunctions, the natural orbitals for all four states are different; we include information for the active-space natural orbitals only. The numbering of the active-space natural orbitals in CSFs corresponds to the order in which these orbitals appear in the lists showing their occupancies.

$S_0$  ( $1^1B_{1g}$ ) state

Occupancies of natural orbitals

-----

Symmetry 5 ( B1u) -- Total occupation in this symmetry is 2.998517251

1.939910483 1.001987233 0.056619535

Symmetry 6 ( B2g) -- Total occupation in this symmetry is 1.999747757

1.892943453 0.106804304

Symmetry 7 ( B3g) -- Total occupation in this symmetry is 1.999747756

1.892943458 0.106804298

Symmetry 8 ( Au ) -- Total occupation in this symmetry is 1.001987236

1.001987236

Printout of CI-coefficients abs greater than 0.05000 for root 1

\*\*\* NOTE: this root is the reference state \*\*\*

Printout of coefficients in interval 3.1623E-01 to 1.0000E+00

=====

|                        |            |            |                |
|------------------------|------------|------------|----------------|
| Coefficient of CSF no. | 39 is      | 0.89412239 | 8.94122394E-01 |
| Orbital                | 1 4 6 2 8  |            |                |
| Spin coupling          | 2 2 2 1 -1 |            |                |

The  $S_0$  data shows that the largest contribution to the  $S_0$  wavefunction (79.9%) is provided by a single configuration state function (CSF), in which the active-space natural orbitals 1, 4 and 6 are doubly-occupied, and the spins of the singly-occupied active-space natural orbitals 2 and 8 are coupled to a singlet.

$S_1$  ( $1^1A_g$ ) state

Occupancies of natural orbitals

-----

Symmetry 5 ( B1u ) -- Total occupation in this symmetry is 3.018022301

1.928102895 1.038015577 0.051903830

Symmetry 6 ( B2g ) -- Total occupation in this symmetry is 1.971970668

1.867502612 0.104468055

Symmetry 7 ( B3g ) -- Total occupation in this symmetry is 1.971970647

1.867502600 0.104468047

Symmetry 8 ( Au ) -- Total occupation in this symmetry is 1.038036384

1.038036384

Printout of CI-coefficients abs greater than 0.05000 for root 1

\*\*\* NOTE: this root is the reference state \*\*\*

Printout of coefficients in interval 3.1623E-01 to 1.0000E+00

=====

|                        |         |            |                |
|------------------------|---------|------------|----------------|
| Coefficient of CSF no. | 7 is    | 0.62102063 | 6.21020633E-01 |
| Orbital                | 1 2 4 6 |            |                |
| Spin coupling          | 2 2 2 2 |            |                |

|                        |         |            |                |
|------------------------|---------|------------|----------------|
| Coefficient of CSF no. | 49 is   | 0.62102879 | 6.21028795E-01 |
| Orbital                | 1 4 6 8 |            |                |
| Spin coupling          | 2 2 2 2 |            |                |

The  $S_1$  data shows that the largest contribution to the  $S_1$  wavefunction (77.1%) is provided by two CSFs, in which all active-space natural orbitals are doubly-occupied (orbitals 1, 2, 4 and 6 in the first CSF, and orbitals 1, 4, 6 and 8 in the second CFS, respectively).

$S_2$  ( $2^1A_g$ ) state

Occupancies of natural orbitals  
-----

Symmetry 5 ( B1u) -- Total occupation in this symmetry is 2.997965956

1.981221666 1.002561542 0.014182748

Symmetry 6 ( B2g) -- Total occupation in this symmetry is 1.999730938

1.963059419 0.036671518

Symmetry 7 ( B3g) -- Total occupation in this symmetry is 1.999730939

1.963059471 0.036671468

Symmetry 8 ( Au ) -- Total occupation in this symmetry is 1.002572167

1.002572167

Printout of CI-coefficients abs greater than 0.10000 for root 2

\*\*\* NOTE: this root is the reference state \*\*\*

Printout of coefficients in interval 3.1623E-01 to 1.0000E+00

=====

|                        |         |             |                 |
|------------------------|---------|-------------|-----------------|
| Coefficient of CSF no. | 7 is    | -0.68519088 | -6.85190880E-01 |
| Orbital                | 1 2 4 6 |             |                 |
| Spin coupling          | 2 2 2 2 |             |                 |

|                        |         |            |                |
|------------------------|---------|------------|----------------|
| Coefficient of CSF no. | 49 is   | 0.68519464 | 6.85194641E-01 |
| Orbital                | 1 4 6 8 |            |                |
| Spin coupling          | 2 2 2 2 |            |                |

The  $S_2$  data shows that the largest contribution to the  $S_2$  wavefunction (93.9%) is provided by two CSFs, in which all active-space natural orbitals are doubly-occupied (orbitals 1, 2, 4 and 6 in the first CSF, and orbitals 1, 4, 6 and 8 in the second CFS, respectively). These CSFs are similar to those dominating the  $S_1$  wavefunction but their combined weight in  $S_2$  is larger, and the coefficients for these CSFs are of opposite signs.

$T_1$  ( $1^3B_{1g}$ ) state

Occupancies of natural orbitals  
-----

Symmetry 5 ( B1u) -- Total occupation in this symmetry is 3.001154697

1.945715406 1.005938179 0.049501112

Symmetry 6 ( B2g) -- Total occupation in this symmetry is 1.996453559

1.894918303 0.101535256

Symmetry 7 ( B3g) -- Total occupation in this symmetry is 1.996453557

1.894918283 0.101535274

Symmetry 8 ( Au ) -- Total occupation in this symmetry is 1.005938187

1.005938187

Printout of CI-coefficients abs greater than 0.05000 for root 1

\*\*\* NOTE: this root is the reference state \*\*\*

Printout of coefficients in interval 3.1623E-01 to 1.0000E+00

=====

|                        |   |   |   |       |            |                |
|------------------------|---|---|---|-------|------------|----------------|
| Coefficient of CSF no. |   |   |   | 39 is | 0.89784048 | 8.97840483E-01 |
| Orbital                | 1 | 4 | 6 | 2     | 8          |                |
| Spin coupling          | 2 | 2 | 2 | 1     | 1          |                |

The  $T_1$  data shows that the largest contribution to the  $T_1$  wavefunction (80.6%) is provided by a single configuration state function (CSF), in which the active-space natural orbitals 1, 4 and 6 are doubly-occupied, and the spins of the singly-occupied active-space natural orbitals 2 and 8 are coupled to a triplet. This is similar to the composition of the  $S_0$  wavefunction, and the main difference between the CSFs dominating the  $S_0$  and  $T_1$  wavefunctions is in the mode of coupling of the spins of the singly-occupied active-space natural orbitals 2 and 8.
